# Supplementary material
Source: bioRxiv or medRxiv preprint supplement (https://www.biorxiv.org/content/biorxiv/early/2019/07/03/691337.1/DC1/embed/media-1.pdf)
Supplement: Supplementary file [file media-1.pdf]

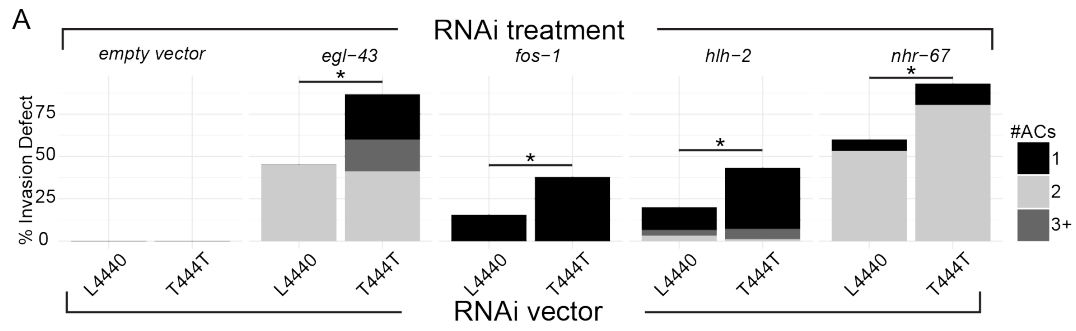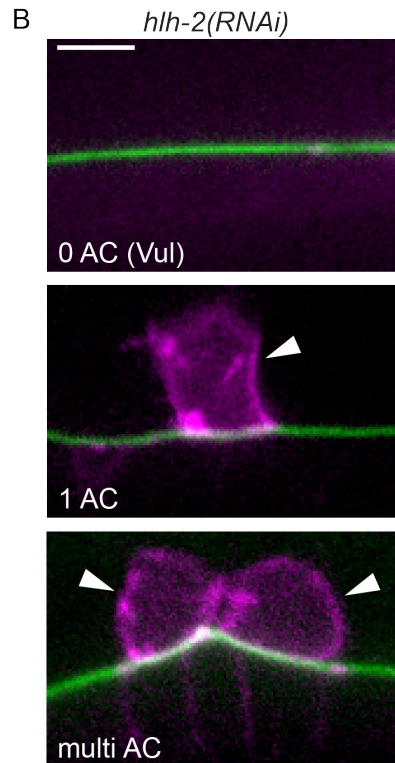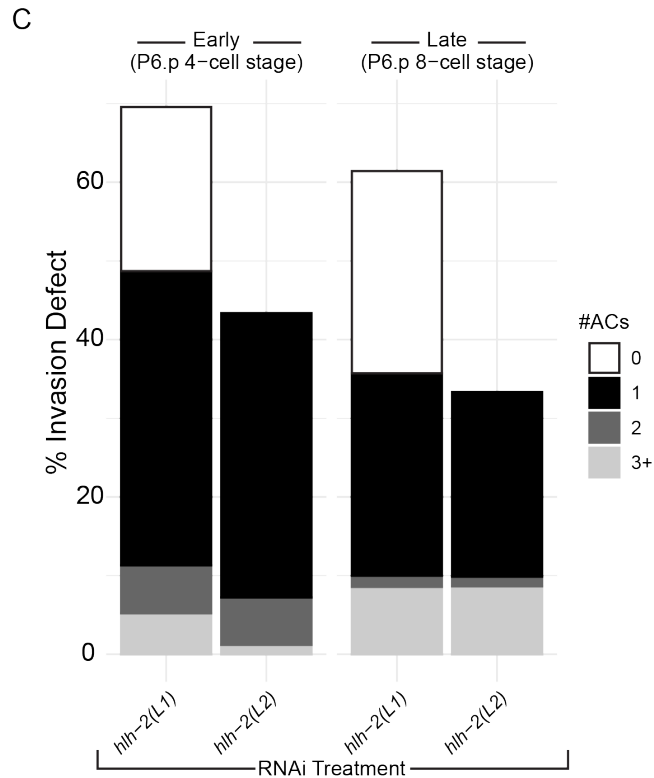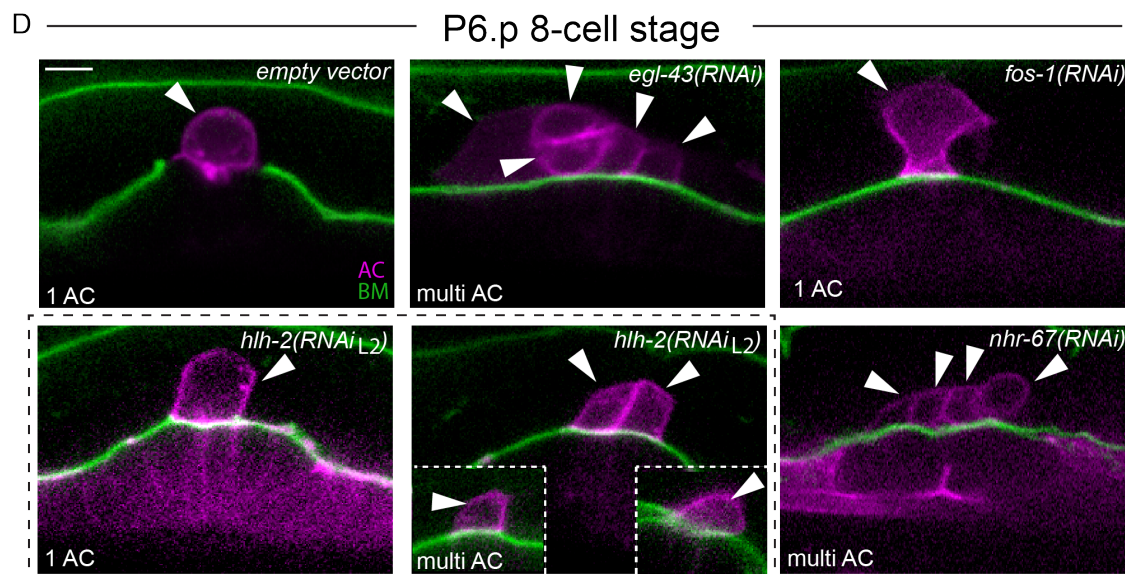

**Fig. S1. Improved RNAi increases penetrance of TF depletion phenotypes.** (A)

Stacked bar graph depicting penetrance of AC invasion defect comparing L4440-based versus T444T-based RNAi depletions. Asterisk (\*) denotes statistical significance between treatments and represents a p-value < 0.03 by Fisher's exact test (n ≥ 30 animals per treatment). (B) Single plane of confocal z-stack depicting L1 plating depletion of *hlh-2*. The AC-specific membrane marker (magenta, *cdh-3<sup>1.5</sup>*>mCherry::PLCδ<sup>PH</sup>) and BM marker (green, *lam-1*>LAM-1::GFP) are overlaid in each micrograph. (C) Stacked bar graphs depicting range of phenotypes following L1 and L2 platings of *hlh-2(RNAi)*. (D) Single plane of confocal z-stacks during the L4 stage depicting representative TF-RNAi phenotypes.

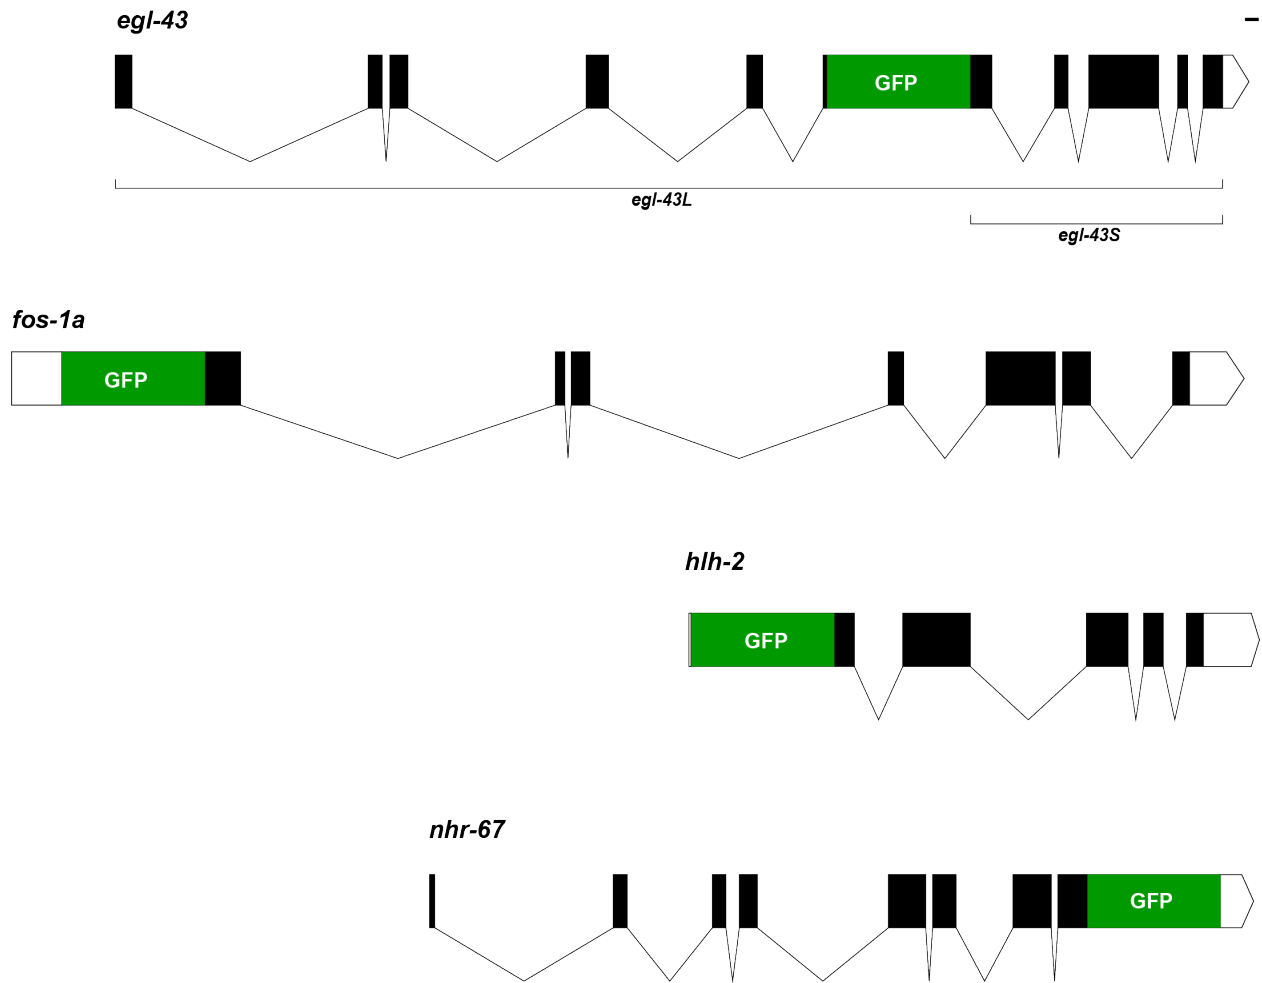

**Fig. S2. Schematic of endogenous GFP-tagged loci of pro-invasive TFs.** Codon-optimized GFP was integrated at the N-terminus of *fos-1A* and *hlh-2*, at the C-terminus of *nhr-67*, and internally in the *egl-43* locus (tagging both isoforms). Figure made using <http://wormweb.org/exonintron>. Scale bar, 100 bp.

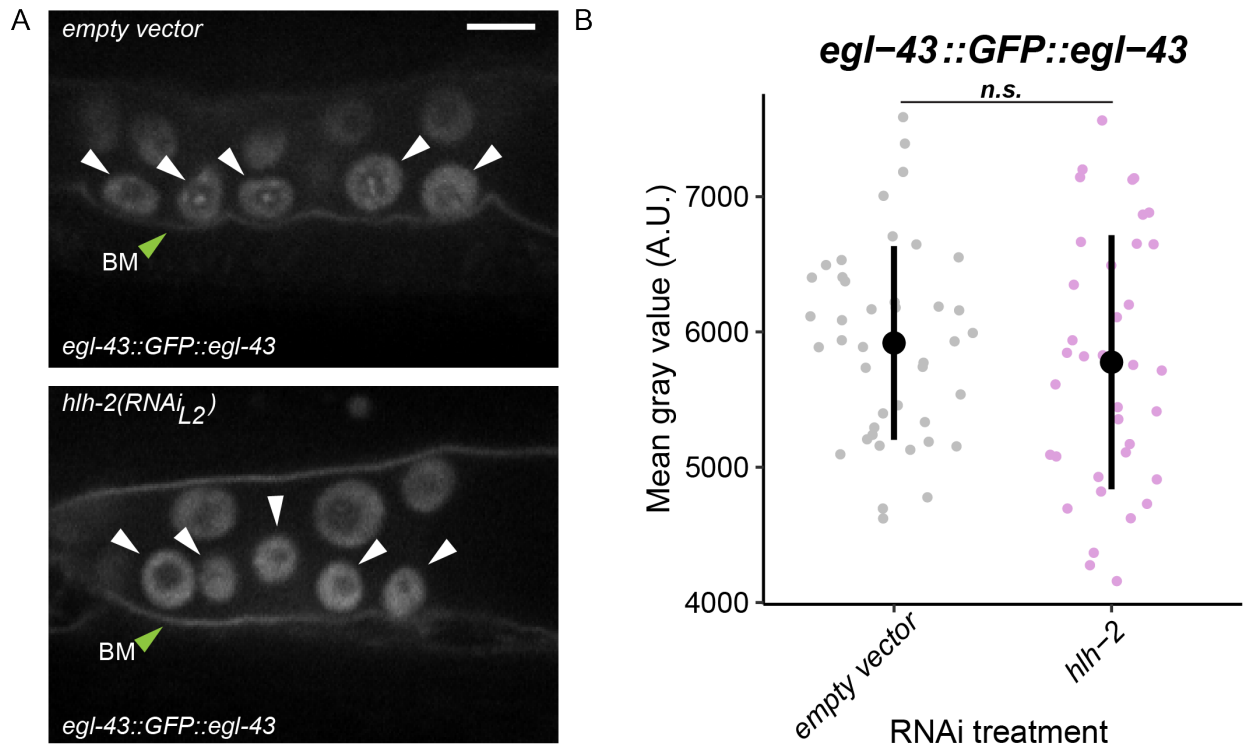

**Fig S3. HLH-2 does not regulate EGL-43 expression in the ventral uterus.** (A)

Single plane of confocal z-stack depicting levels of *egl-43::GFP::egl-43* in the ventral uterine (VU) cells (white arrowheads) in empty vector controls (top) as compared to *hlh-2(RNAi)* depletion. BM indicated by green arrowheads. (B) Sina plots of *egl-43::GFP::egl-43* levels, defined as the mean gray value of individual VU nuclei, following *hlh-2* RNAi perturbation ( $n \geq 10$  animals,  $n \geq 37$  VU cells quantified per treatment). *n.s.*, not significant,  $p$ -value = 0.45 Student's t-test).

Table S1: Scoring tables

| Genotype                                                                                                                                         | RNAi Treatment              | P6.p stage | % Invaded (#ACs) |     |   |    | % Not invaded (#ACs) |    |    |    | n   |
|--------------------------------------------------------------------------------------------------------------------------------------------------|-----------------------------|------------|------------------|-----|---|----|----------------------|----|----|----|-----|
|                                                                                                                                                  |                             |            | 0                | 1   | 2 | 3+ | 0                    | 1  | 2  | 3+ |     |
| <i>rrf-3(pk1426) II; unc-119(ed3) III; rde-1(ne219) V; fos-1a&gt;RDE-1, myo-2&gt;YFP; cdh-3&gt;PH::mCherry; lam-1&gt;LAM-1::GFP + unc-119(+)</i> | <i>empty vector T444T</i>   | 4-cell     | 0                | 100 | 0 | 0  | 0                    | 0  | 0  | 0  | 50  |
|                                                                                                                                                  | <i>egl-43(RNAi) T444T</i>   | 4-cell     | 0                | 12  | 1 | 0  | 0                    | 27 | 19 | 41 | 75  |
|                                                                                                                                                  | <i>egl-43L(RNAi) T444T</i>  | 4-cell     | 0                | 41  | 1 | 0  | 0                    | 19 | 15 | 24 | 80  |
|                                                                                                                                                  | <i>fos-1(RNAi) T444T</i>    | 4-cell     | 0                | 62  | 0 | 0  | 0                    | 38 | 0  | 0  | 66  |
|                                                                                                                                                  | <i>hlh-2_L1(RNAi) T444T</i> | 4-cell     | 0                | 30  | 0 | 0  | 21                   | 37 | 6  | 5  | 115 |
|                                                                                                                                                  | <i>hlh-2_L2(RNAi) T444T</i> | 4-cell     | 0                | 57  | 0 | 0  | 0                    | 36 | 6  | 1  | 83  |
|                                                                                                                                                  | <i>nhr-67(RNAi) T444T</i>   | 4-cell     | 0                | 7   | 0 | 0  | 0                    | 13 | 0  | 81 | 72  |
|                                                                                                                                                  | <i>empty vector T444T</i>   | 8-cell     | 0                | 100 | 0 | 0  | 0                    | 0  | 0  | 0  | 50  |
|                                                                                                                                                  | <i>egl-43(RNAi) T444T</i>   | 8-cell     | 0                | 40  | 5 | 5  | 0                    | 0  | 4  | 45 | 55  |
|                                                                                                                                                  | <i>egl-43L(RNAi) T444T</i>  | 8-cell     | 0                | 78  | 9 | 5  | 0                    | 7  | 0  | 2  | 58  |
|                                                                                                                                                  | <i>fos-1(RNAi) T444T</i>    | 8-cell     | 0                | 90  | 0 | 0  | 0                    | 10 | 0  | 0  | 50  |
|                                                                                                                                                  | <i>hlh-2_L1(RNAi) T444T</i> | 8-cell     | 0                | 41  | 3 | 0  | 24                   | 24 | 1  | 8  | 76  |
|                                                                                                                                                  | <i>hlh-2_L2(RNAi) T444T</i> | 8-cell     | 0                | 64  | 1 | 1  | 0                    | 23 | 1  | 9  | 81  |
|                                                                                                                                                  | <i>nhr-67(RNAi) T444T</i>   | 8-cell     | 0                | 32  | 0 | 0  | 0                    | 0  | 0  | 68 | 57  |
|                                                                                                                                                  | <i>empty vector L4440</i>   | 4-cell     | 0                | 100 | 0 | 0  | 0                    | 0  | 0  | 0  | 30  |
|                                                                                                                                                  | <i>egl-43(RNAi) L4440</i>   | 4-cell     | 0                | 55  | 0 | 0  | 0                    | 0  | 0  | 45 | 31  |
|                                                                                                                                                  | <i>fos-1(RNAi) L4440</i>    | 4-cell     | 0                | 84  | 0 | 0  | 0                    | 16 | 0  | 0  | 32  |
|                                                                                                                                                  | <i>hlh-2_L1(RNAi) L4440</i> | 4-cell     | 0                | 69  | 0 | 0  | 9                    | 16 | 0  | 6  | 32  |
|                                                                                                                                                  | <i>hlh-2_L2(RNAi) L4440</i> | 4-cell     | 0                | 80  | 0 | 0  | 0                    | 13 | 3  | 3  | 30  |
|                                                                                                                                                  | <i>nhr-67(RNAi) L4440</i>   | 4-cell     | 0                | 40  | 0 | 0  | 0                    | 7  | 0  | 53 | 30  |
| <i>cdh-3(5kb)&gt;CKI-1::GFP; zmp-1&gt;mCherry</i>                                                                                                | <i>empty vector T444T</i>   | 4-cell     | 0                | 100 | 0 | 0  | 0                    | 0  | 0  | 0  | 51  |
|                                                                                                                                                  | <i>egl-43(RNAi) T444T</i>   | 4-cell     | 0                | 10  | 0 | 0  | 0                    | 90 | 0  | 0  | 31  |
|                                                                                                                                                  | <i>fos-1(RNAi) T444T</i>    | 4-cell     | 0                | 20  | 0 | 0  | 0                    | 80 | 0  | 0  | 35  |
|                                                                                                                                                  | <i>hlh-2_L2(RNAi) T444T</i> | 4-cell     | 0                | 92  | 0 | 0  | 0                    | 8  | 0  | 0  | 77  |
|                                                                                                                                                  | <i>nhr-67(RNAi) T444T</i>   | 4-cell     | 0                | 100 | 0 | 0  | 0                    | 0  | 0  | 0  | 42  |
| <i>laminin::GFP; zmp-1&gt;mCherry</i>                                                                                                            | <i>empty vector T444T</i>   | 4-cell     | 0                | 100 | 0 | 0  | 0                    | 0  | 0  | 0  | 27  |
|                                                                                                                                                  | <i>egl-43(RNAi) T444T</i>   | 4-cell     | 0                | 19  | 3 | 0  | 0                    | 30 | 22 | 27 | 37  |
|                                                                                                                                                  | <i>fos-1(RNAi) T444T</i>    | 4-cell     | 0                | 49  | 0 | 0  | 0                    | 51 | 0  | 0  | 53  |
|                                                                                                                                                  | <i>hlh-2_L2(RNAi) T444T</i> | 4-cell     | 0                | 56  | 0 | 0  | 0                    | 31 | 3  | 10 | 59  |
|                                                                                                                                                  | <i>nhr-67(RNAi) T444T</i>   | 4-cell     | 0                | 47  | 0 | 0  | 0                    | 0  | 35 | 18 | 62  |
| <i>egl-43L&gt;SEC::GFP::EGL-43; cdh-3&gt;mCherry::moeABD; laminin::GFP</i>                                                                       | N/A                         | 4-cell     | 0                | 67  | 3 | 0  | 0                    | 8  | 17 | 6  | 51  |
| <i>egl-43L&gt;SEC::GFP::EGL-43/mT1; cdh-3&gt;mCherry::moeABD; laminin::GFP</i>                                                                   | N/A                         | 4-cell     | 0                | 100 | 0 | 0  | 0                    | 0  | 0  | 0  | 25  |

|                                                                                                |                             |        |   |    |   |   |   |    |    |     |     |
|------------------------------------------------------------------------------------------------|-----------------------------|--------|---|----|---|---|---|----|----|-----|-----|
| <i>egl-43&gt;LoxP::GFP::EGL-43;</i><br><i>cdh-3&gt;mCherry::moeABD;</i><br><i>laminin::GFP</i> | <i>egl-43(RNAi) T444T</i>   | 4-cell | 0 | 0  | 0 | 0 | 0 | 13 | 22 | 123 | 158 |
| <i>fos-1&gt;LoxP::GFP::FOS-1; cdh-</i><br><i>3&gt;mCherry::moeABD;</i><br><i>laminin::GFP</i>  | <i>hlh-2_L2(RNAi) T444T</i> | 4-cell | 0 | 12 | 0 | 0 | 0 | 38 | 0  | 0   | 50  |
| <i>hlh-2&gt;LoxP::GFP::HLH-2; cdh-</i><br><i>3&gt;mCherry::moeABD;</i><br><i>laminin::GFP</i>  | <i>fos-1(RNAi) T444T</i>    | 4-cell | 0 | 22 | 0 | 0 | 0 | 11 | 6  | 81  | 120 |
| <i>nhr-67&gt;NHR-67::GFP; cdh-</i><br><i>3&gt;mCherry::moeABD;</i><br><i>laminin::GFP</i>      | <i>nhr-67(RNAi) T444T</i>   | 4-cell | 0 | 19 | 2 | 0 | 0 | 0  | 14 | 95  | 130 |

Table S2: Strains

| Strain | Genotype                                                                                                                                                                        | Description                                                                                                     | Figure(s)                                            | Source             |
|--------|---------------------------------------------------------------------------------------------------------------------------------------------------------------------------------|-----------------------------------------------------------------------------------------------------------------|------------------------------------------------------|--------------------|
| NK1316 | <i>rff-3(pk1426) II; unc-119(ed3) III; rde-1(ne219) V; qyls102[fos-1a&gt;RDE-1, myo-2&gt;YFP]; qyls24[cdh-3&gt;PH::mCherry]; qyls10[lam-1&gt;LAM-1::GFP with unc-119(with)]</i> | uterine-specific RNAi strain with AC and BM markers                                                             | 1-2, 8,S1                                            | Matus et al., 2015 |
| DQM497 | <i>fos-1(bmd138[fos-1&gt;LoxP::GFP::FOS-1]) V.</i>                                                                                                                              | endogenous <i>fos-1</i> GFP reporter                                                                            | 3                                                    | This study         |
| DQM337 | <i>egl-43(bmd88[egl-43&gt;LoxP::GFP::EGL-43]) II; qyls225[cdh-3&gt;mCherry::moeABD] V.</i>                                                                                      | endogenous <i>egl-43</i> GFP reporter with AC marker                                                            | 3,8                                                  | This study         |
| DQM352 | <i>hlh-2(bmd90[hlh-2&gt;LoxP::GFP::HLH-2]) I; qyls225[cdh-3&gt;mCherry::moeABD] V.</i>                                                                                          | endogenous <i>hlh-2</i> GFP reporter with AC marker                                                             | 3,8                                                  | This study         |
| DQM291 | <i>nhr-67(syb509[nhr-67&gt;NHR-67::GFP]) IV; qyls227[cdh-3&gt;mCherry::moeABD] I.</i>                                                                                           | endogenous <i>nhr-67</i> GFP reporter with AC marker                                                            | 3,8                                                  | This study         |
| DQM335 | <i>egl-43(bmd88[egl-43&gt;LoxP::GFP::EGL-43]) II; qyls225[cdh-3&gt;mCherry::moeABD] V; qyls7[laminin::GFP] X.</i>                                                               | endogenous <i>egl-43</i> GFP reporter with AC and BM markers                                                    | 4-5, S3                                              | This study         |
| DQM515 | <i>fos-1(bmd138[fos-1&gt;LoxP::GFP::FOS-1]) V; qyls227[cdh-3&gt;mCherry::moeABD] I; qyls7[laminin::GFP] X.</i>                                                                  | endogenous <i>fos-1</i> GFP reporter with AC and BM markers                                                     | 4-5                                                  | This study         |
| DQM350 | <i>hlh-2(bmd90[hlh-2&gt;LoxP::GFP::HLH-2]) I; qyls225[cdh-3&gt;mCherry::moeABD] V; qyls7[laminin::GFP] X.</i>                                                                   | endogenous <i>hlh-2</i> GFP reporter with AC and BM markers                                                     | 4-5                                                  | This study         |
| DQM368 | <i>nhr-67(syb509[nhr-67&gt;NHR-67::GFP]) IV; qyls225[cdh-3&gt;mCherry::moeABD] V; qyls7[laminin::GFP] X.</i>                                                                    | endogenous <i>nhr-67</i> GFP reporter with AC and BM markers                                                    | 4-5                                                  | This study         |
| DQM7   | <i>qyls330 [laminin::mCherry]; qyls232 [CDT-1::GFP]</i>                                                                                                                         | G1 cell cycle phase reporter with BM marker                                                                     | 6                                                    | Matus et al., 2015 |
| DQM39  | <i>qyls17 [zmp-1&gt;mCherry] II; qyls266[cdh-3(5kb)&gt;CKI-1::GFP] V</i>                                                                                                        | <i>zmp-1</i> mCherry reporter with AC-specific CKI-1 over-expression                                            | 6                                                    | Matus et al., 2015 |
| NK272  | <i>qyls7[laminin::GFP]; qyls17[zmp-1&gt;mCherry]</i>                                                                                                                            | <i>zmp-1</i> mCherry reporter with BM marker                                                                    | 6                                                    | Matus et al., 2015 |
| DQM500 | <i>bmd135[egl-43L&gt;SEC::GFP::EGL-43] II/mT1; qyls227[cdh-3&gt;mCherry::moeABD] I; qyls7[laminin::GFP] X.</i>                                                                  | endogenous <i>egl-43L</i> transcriptional reporter (with SEC) balanced with mT1 balancer with AC and BM markers | 7                                                    | This study         |
| DQM494 | <i>egl-43(bmd136[egl-43L&gt;LoxP::GFP::EGL-43]) II.</i>                                                                                                                         | endogenous <i>egl-43L</i> GFP reporter                                                                          | 7                                                    | This study         |
| DQM503 | <i>egl-43(bmd87[egl-43&gt;SEC::GFP::EGL-43] II/mT1; qyls227[cdh-3&gt;mCherry::moeABD] I; qyls7[laminin::GFP] X.</i>                                                             | endogenous <i>egl-43</i> transcriptional reporter (with SEC) balanced over mT1 with AC and BM markers           | 7                                                    | This study         |
| DQM300 | <i>egl-43(bmd88[egl-43&gt;LoxP::GFP::EGL-43]) II.</i>                                                                                                                           | endogenous <i>egl-43</i> GFP reporter                                                                           | Will be made available through the CGC (cgc.umn.edu) |                    |
| DQM497 | <i>fos-1(bmd138[fos-1&gt;LoxP::GFP::FOS-1]) V.</i>                                                                                                                              | endogenous <i>fos-1</i> GFP reporter                                                                            |                                                      |                    |
| DQM311 | <i>hlh-2(bmd90[hlh-2&gt;LoxP::GFP::HLH-2]) I.</i>                                                                                                                               | endogenous <i>hlh-2</i> GFP reporter                                                                            |                                                      |                    |
| PHX509 | <i>nhr-67(syb509[nhr-67&gt;NHR-67::GFP]) IV.</i>                                                                                                                                | endogenous <i>nhr-67</i> GFP reporter                                                                           |                                                      |                    |

**Table S3: Primers**

| Primer | Primer sequence (5'→3')                                            | Primer type | Amplicon                                                  | Template                                                          |
|--------|--------------------------------------------------------------------|-------------|-----------------------------------------------------------|-------------------------------------------------------------------|
| DQM657 | tcactataggagaccggcaATG                                             | Forward     | <i>hlh-2</i> and <i>nhr-67</i> synthesized DNAs for T444T | Twist Biosciences gene fragments for <i>hlh-2</i> , <i>nhr-67</i> |
| DQM658 | attgggtaccgggcccc                                                  | Reverse     |                                                           |                                                                   |
| DQM688 | gagctcAGATCTatgagcatcgacacagacttc                                  | Forward     | BglII- <i>egl-43L</i> -XhoI for T444T                     | Twist Biosciences gene fragment for <i>egl-43L</i>                |
| DQM689 | acgtacCTCGAGctgactttgacacggtgggc                                   | Reverse     |                                                           |                                                                   |
| DQM720 | TCACTATAGGGAGACCGGCAATG                                            | Forward     | BglII- <i>egl-43</i> -Sall for T444T                      | <i>egl-43</i> IDT gBlock                                          |
| DQM722 | GCCCCCCTCGAGGTGAACTTTTG<br>GCACCGAAC                               | Reverse     |                                                           |                                                                   |
| DQM708 | ggtttgccacctctgacttg                                               | Forward     | colony PCR screening of T444T constructs                  | T444T-based constructs                                            |
| DM191  | gtaatacgaactataggcggaattgg                                         | Reverse     |                                                           |                                                                   |
| DQM433 | ACGTTGTA AACGACGGCCAG                                              | Forward     | amplify left homology arm (universal)                     | Twist Biosciences gene fragments                                  |
| DQM434 | CTCCAGTGAACAATTCTTCTCCTTTAC<br>TC                                  | Reverse     | amplify left homology arm (universal)                     |                                                                   |
| DQM435 | GCGTGATTACAAGGATGACGATGAC                                          | Forward     | amplify right homology arm (universal)                    |                                                                   |
| DQM436 | GAAACAGCTATGACCATGTTATCGAT<br>TTCC                                 | Reverse     | amplify right homology arm (universal)                    |                                                                   |
| DQM751 | tcctattgagagatgtctGTCCACTCTTTATA<br>TAGCAGTTTTAGAGCTAGAAATAGC      | Forward     | <i>fos-1a</i> sgRNA                                       |                                                                   |
| DQM747 | tcctattgagagatgtctGgatgctcatcctgaaaact<br>GTTTTAGAGCTAGAAATAGC     | Forward     | <i>egl-43L</i> sgRNA                                      | pDD122                                                            |
| DQM438 | tcctattgagagatgtctGaatgagATGCCATC<br>ACAAGTTTTAGAGCTAGAAATAGC      | Forward     | <i>egl-43</i> sgRNA                                       | pDD122                                                            |
| DQM440 | tcctattgagagatgtctGAGTTTTCAGAACC<br>TCAATGGTTTTAGAGCTAGAAATAG<br>C | Forward     | <i>hlh-2</i> sgRNA                                        | pDD122                                                            |
| DQM412 | AGATTGTA CTGAGAGTGCACCATATG<br>CGGTGTGAAATACCGCAC                  | Reverse     | amplify sgRNA (universal)                                 | pDD122                                                            |

**Table S4: Plasmids**

| Plasmid | Base vector | Description                                |
|---------|-------------|--------------------------------------------|
| pTNM011 | pDD122      | <i>egl-43</i> internal sgRNA               |
| pTNM012 | pDD282      | <i>egl-43::GFP::egl-43</i> repair template |
| pTNM013 | pDD122      | <i>fos-1</i> N-terminal sgRNA              |
| pTNM014 | pDD282      | <i>GFP::fos-1</i> repair template          |
| pTNM015 | pDD122      | <i>hlh-2</i> N-terminal sgRNA              |
| pTNM016 | pDD282      | <i>GFP::hlh-2</i> repair template          |
| pTNM046 | pDD122      | <i>egl-43L</i> N-terminal sgRNA            |
| pTNM047 | pDD282      | <i>GFP::egl-43L</i> repair template        |
| pWZ172  | T444T       | <i>egl-43</i> RNAi                         |
| pWZ173  | T444T       | <i>egl-43L</i> RNAi                        |
| pWZ174  | T444T       | <i>fos-1</i> RNAi                          |
| pWZ175  | T444T       | <i>hlh-2</i> RNAi                          |
| pWZ176  | T444T       | <i>nhr-67</i> RNAi                         |



**Table S5: CRISPR reagents**

|                          | Guide                | Left homology arm sequence                                                                                                                                                                                                                                                                                                                                                                                                                                                                                                                                                                                                                                                                                                                                                                                                                                                                                                                                                                                                                                                                                                                                                                                                                                                                                                                                                                                                                                                                                                                                                                                                                                                                                                                                                                                                                                                                                                                                                                                                                                                                                                                                                       | Right homology arm sequence                                                                                                                                                                                                                                                                                                                                                                                                                                                                                                                                                                                                                                                                                                                                                                                                                                                                                                                                                                                                                                                                                                                                                                                                                                                                                                                                                                                                                                                                                                                                                                                                                                                                                                                                                                                                                                                                                                                                                                                                                                                                                                        |
|--------------------------|----------------------|----------------------------------------------------------------------------------------------------------------------------------------------------------------------------------------------------------------------------------------------------------------------------------------------------------------------------------------------------------------------------------------------------------------------------------------------------------------------------------------------------------------------------------------------------------------------------------------------------------------------------------------------------------------------------------------------------------------------------------------------------------------------------------------------------------------------------------------------------------------------------------------------------------------------------------------------------------------------------------------------------------------------------------------------------------------------------------------------------------------------------------------------------------------------------------------------------------------------------------------------------------------------------------------------------------------------------------------------------------------------------------------------------------------------------------------------------------------------------------------------------------------------------------------------------------------------------------------------------------------------------------------------------------------------------------------------------------------------------------------------------------------------------------------------------------------------------------------------------------------------------------------------------------------------------------------------------------------------------------------------------------------------------------------------------------------------------------------------------------------------------------------------------------------------------------|------------------------------------------------------------------------------------------------------------------------------------------------------------------------------------------------------------------------------------------------------------------------------------------------------------------------------------------------------------------------------------------------------------------------------------------------------------------------------------------------------------------------------------------------------------------------------------------------------------------------------------------------------------------------------------------------------------------------------------------------------------------------------------------------------------------------------------------------------------------------------------------------------------------------------------------------------------------------------------------------------------------------------------------------------------------------------------------------------------------------------------------------------------------------------------------------------------------------------------------------------------------------------------------------------------------------------------------------------------------------------------------------------------------------------------------------------------------------------------------------------------------------------------------------------------------------------------------------------------------------------------------------------------------------------------------------------------------------------------------------------------------------------------------------------------------------------------------------------------------------------------------------------------------------------------------------------------------------------------------------------------------------------------------------------------------------------------------------------------------------------------|
| <i>egl-43 (internal)</i> | aagtcagatgccatcacaag | <p>CTAAGATATGAGAACCCGTTTACAGAGTCCTTTT<br/>                     ATAGAATTTTGGTTTTTATAATAGAGATGTATGGA<br/>                     AACCGGGCAAAGTTAATTAGGATTCTTACAGCCA<br/>                     ACAAGAAAATTTAAGATAAGTAACGACCAAAAC<br/>                     TTGAGCGGAGTTGAAAGTTCAGTGCATTACAATT<br/>                     GAAGTTTTTATTATTATTTATTTATCTTGGGCTA<br/>                     GAATAGATGGAGCATCTTACAGGACTGGACTT<br/>                     ATATAATGGCTATCTGCCCTGCCTACCTGC<br/>                     CTTTCGTTTTATTATACTGTATTTGCGCAATATA<br/>                     AACTCATGCATTTCTATTTGTTAGAAGTAAAAAA<br/>                     AACAATATTTAGAAAACGTTACATGTACTTTGAT<br/>                     AGTTGGCTCGCATGTTGGCAGAAGGCAGGCCACA<br/>                     GGAACCCCTGAAGGCACTTAGGCAGGTTTCGCT<br/>                     GGACAAAATACCTGCTGATTGTCTGATTTATTT<br/>                     TCACTAATAATCAGATATGAAACATGGACAAT<br/>                     TGGGTACAATACTAATAGAGGGTGTACTGCTATA<br/>                     TAACTTCTCCGAATCAAACTTAACAGTCATTCA<br/>                     CATTCACTATCACGTGTTATCAATCAATTTTTTTC<br/>                     AGCGGTCTCAAAACAACACTCTCATATTCATTGCT<br/>                     CCTTAAAGCCGTTTCGGTGTCAATTTGTGTCAAA<br/>                     GTCCTACACACAATTCTCAAATCTGTGCAGGCAC<br/>                     CGGAGAGTTCATTCAAGTGTGATTAATTTAGAG<br/>                     TTTCTAAGAATAAACTGAGCACTGTAATAATCTAT<br/>                     CGTGCAATGCTCCTGGGCTAAGAGTCCTTAAAG<br/>                     AGAGGATATAAACTGAATAAACCCCATAACTC<br/>                     ACAACAGGGGGGAAAACCTCGAGGCGTGGTCAA<br/>                     GAAGGTTATTGTCCTCTGTACTAATAAAAACGGA<br/>                     AACGATTTCAATGATGTGCCCCACCTGAGGTG<br/>                     GTCCCTTCCTTAATTGTTTACCCCGTGAGAAAAG<br/>                     TGCAAGGAGCCATGATGCTCCGCCCTCTTTCTT<br/>                     CTCAACCAATAAGACACGCGCGCCGCCATCCC<br/>                     TCGTGCACTTCCCTTTGGGGTGTGTACAGGG<br/>                     CTCATTCTTGACGTGCGCTTCCCACCTTTACC<br/>                     AGTGTGTTATCAATCTCCGTCTTATTCATTAGTG<br/>                     AATAAATATTCCAGGACGGTTGGACGTGCCAA<br/>                     CGTGTCAAAGTCAG</p> | <p>ATGCCATACAAGCGGCACTAACGAAGCATCGACC<br/>                     AGTTTGCGAGATGACTGCACTTACAAAACCATTGAT<br/>                     GCGCAACTTGCCGGATTGAGCGGAGCAGGTGGAT<br/>                     TAGGTTCCGTGCCATATTGGCCACATATACTTCAAA<br/>                     TGGCAACACAGGTTAGTTATTATTTTAAAACTCAAC<br/>                     TATAGATACCGTCTCCCCTATTACTATTGCATCCCAT<br/>                     TATTCAACTTTGACGCTTATATTTCAGTTCCGTTT<br/>                     GTCCTACATGAAAATGATCAATTGGCCAATTTTTTAT<br/>                     TATTTCTTCTCTATAGTTTTGTAGTTGATAAAATAAT<br/>                     CAAATCGTCATAATGAACCGAGATATAGCATTTCAAA<br/>                     GTGAAATAGTGGGCTGCAATAGAGGAAATAAGGTAA<br/>                     TTTCCCTCACCCCTTGACTATACAACACTCTTGAG<br/>                     AGTATCCATGGACAACAATCATCGTACCTTAATTAAC<br/>                     CTACCTTAAGCCTCCTCCCAACCTCTCCATCTCTTC<br/>                     CGTTCAATATGATACCTTCATTTCCCGCATCTCGGG<br/>                     GGCTTAATCCTCTTTCCCTTCTCTTCCCAAGCGGT<br/>                     AATGAACATGCACTCATTTTCAGGCACCACATTTCC<br/>                     CGCTTGCTTTTCTTGCCGCCAATCCAGAAGCGTACA<br/>                     AACTGATGCAGCAGACGACGTGTGCATCTCCAGAT<br/>                     GCCGAGTGTTCAGGTTTGTGAATGATTTATATGGT<br/>                     GAATCAAAAAAAAAAGTGGAGTAGTTCTCTTACTCTTA<br/>                     TCAATAATTGATTTATTCTATTCACTCTTTAGTACTAG<br/>                     TGAGAAGCTAATATATTGTATAGAAAACACAAAAAAA<br/>                     AATCAATTTATTCCAGTGGACATGCCAGTGAATCTTC<br/>                     ACCAACTACAACGAACAGTCCGACCTAACAGCTAC<br/>                     ACCAAAACCTCCTTCGACGTCTGAAATGGAACTAC<br/>                     ATCAAAGTCCGACGATGGAGAGGATCGTGACAGCA<br/>                     TCGGAGACTCTGGGAATGATGATGATGACTCAG<br/>                     AAGCTGGAGTCTAGATGAGTCGTCCACAACAACGT<br/>                     CAACGAAAAAGCGTCCGACATCTCACACAATTTCCG<br/>                     ACATACTCGCTGCTCCACAACCTCGGTGCTCAGGCTT<br/>                     TGAATTCGACGTTCTTGGCATGCTTCAGCGCTCGC<br/>                     TTAATTATAATCCAGCAGTTCATCGCCTCACTCATT<br/>                     TC</p> |

|                                                                                           |                             |                                                                                                                                                                                                                                                                                                                                                                                                                                                                                                                                                                                                                                                                                                                                                                                                                                                                                                                                                                                                                                                                                                                                                                                                                                                                                                                                                                                                                                                                                                                                                                                                                                                                           |                                                                                                                                                                                                                                                                                                                                                                                                                                                                                                                                                                                                                                                                                                                                                                                                                                                                                                                                                                                                                                                                                                                                                                                                                                                                                                                      |
|-------------------------------------------------------------------------------------------|-----------------------------|---------------------------------------------------------------------------------------------------------------------------------------------------------------------------------------------------------------------------------------------------------------------------------------------------------------------------------------------------------------------------------------------------------------------------------------------------------------------------------------------------------------------------------------------------------------------------------------------------------------------------------------------------------------------------------------------------------------------------------------------------------------------------------------------------------------------------------------------------------------------------------------------------------------------------------------------------------------------------------------------------------------------------------------------------------------------------------------------------------------------------------------------------------------------------------------------------------------------------------------------------------------------------------------------------------------------------------------------------------------------------------------------------------------------------------------------------------------------------------------------------------------------------------------------------------------------------------------------------------------------------------------------------------------------------|----------------------------------------------------------------------------------------------------------------------------------------------------------------------------------------------------------------------------------------------------------------------------------------------------------------------------------------------------------------------------------------------------------------------------------------------------------------------------------------------------------------------------------------------------------------------------------------------------------------------------------------------------------------------------------------------------------------------------------------------------------------------------------------------------------------------------------------------------------------------------------------------------------------------------------------------------------------------------------------------------------------------------------------------------------------------------------------------------------------------------------------------------------------------------------------------------------------------------------------------------------------------------------------------------------------------|
| <p style="writing-mode: vertical-rl; transform: rotate(180deg);">egl-43L (N-terminus)</p> | <p>gatgctcatcctgaaaactt</p> | <p>TATTTTCCGTCCAGCAATTTACTTCCAAAAATTCA<br/>         AACTAAGTCAATAGTTGTTATAGTTTTAAGTTGG<br/>         TCTTTGATTATTGAGCAGTTCCGGTAAACTCGCAG<br/>         CCGACCTCGATGGAGTCTCGCGATAGCCTACTC<br/>         CTGGAAAAACGTTTGTCTTCTGCTTTCACCTCA<br/>         TGATATCAGGAACTTATTACAGACATTCAGCCG<br/>         ACAAATAAACGGCTTGGCTTCTACTAGAAATGCT<br/>         CAATAGATTCTAATTTAGTAGGTGTAGATTTTT<br/>         ACTTTTGTTTATTTTTCTAAGTATCGAAGTACATA<br/>         TGTTAGAAAGTAAATAAAAAATTGCTATTCTACTTT<br/>         AAGAATTTCTATATTAATAAGTCTTTAGTAACG<br/>         TGGGGTTTTCGAACTTGCAACTTTTCAAGTGAA<br/>         GATGCTCCTCACCTGAAGCATCCTGTCACCTCA<br/>         CCGATTGGCTGATGGCGTGTCTGCTTCCATCT<br/>         CTTCCACCCGCCACTTTTTGAGACAGGAGAGG<br/>         CTCTCGCTCCTCTCGCATCCACAAATGGAAGGC<br/>         GCCTCTTTCCATCTTCTTTCTTTTTTTCTGGTT<br/>         AGTTGAAGTATCCTTAAAGTATCTTGACGTTTTTA<br/>         CTATATAGACTTCTGGAGAGACATTCGAGTTTT<br/>         TGGATCAAATATAGAATGTCAAATTTGAAGAGC<br/>         AATCTTCTCATATGTCAAATTTTCAATAAAATTGT<br/>         ATCCTACATTGTGGTGGTGTAGAACCCTCAAAAA<br/>         ATAATCTCTAAATTAAGAATTTCTTGATTTAAAA<br/>         CTGACTAGCAAATTTGTCATGAAAAATCTCAAAC<br/>         GAATTTCTACAGTTCATCTACCAAATGAATTGG<br/>         GCTTGAAACTTTTTTACCATCTACTAAAAAATTC<br/>         AATAAAATAATAATCTCTTCCCAAACCTACACCTC<br/>         CCTCCAATATCTCTCAGTTACTCCTAACTCCTA<br/>         TCCCAAATTCGTACATCTACCGTACCATTCTCC<br/>         TCCCTGTTCTCAATGACAAAGCCAGCCTTG<br/>         AACAGCCATATCCAACTTTTTCTGTTGCAATTGTT<br/>         TCGTTCCACAAGATGTATTACTCATCTTTGCCCC<br/>         AAAACTGTTCTTGTAAATTTGTACAGTTCTTGTTC<br/>         TTCCACGTACAGTTTCCTAAGTTTTTCAGG</p> | <p>ATGAGCATCGACACAGACTTCCCTCACGAGTGTGAG<br/>         GTAAAGGAGGATGAGCTACATGGAAATGTGCTCATT<br/>         GCAGTAACTCAAATTGCACCTCGGAAGGACCATCGGT<br/>         GTGATTGATAAGGTGAGCTTTTGGTGTACAATTTTTA<br/>         CGCCGTAGACATTGTCTTAGAGGTTCCCGCTAGAAA<br/>         AAGAAGTATAAGCTTATTTCCGGGGCTCTAAAAAAC<br/>         TCCACCGGAAAAATACAGGTCGCTTGAAGTAAAT<br/>         ATCTTATAGCTTGTAGTAACTATGAAATAAGCTTTCA<br/>         GATGTTACACTCATATTTTGTAGTTAGTAGTTATAT<br/>         GATAACAGTAATTTTAGGTTGTAATTGATAAAATAAT<br/>         GACTTTTTTAAATTAACAAAACTTTTTTTAAATATTT<br/>         TTACAAGCATTTTAAATTGATACCTTGGTGCCTAATC<br/>         TACCTAATCTACAGTACCTTCGCCAACATTTTCAAAT<br/>         CCTTTCCCTAATGATTCAACGTTTGAATTAACAATTTCT<br/>         TCCCAGAACCCAAAACCGCAATTATCGGGACCCTGA<br/>         AATGTTTGGCGCCATGTGTTCTCCCTGCTTCTTCT<br/>         CCTCAAAAATCTTACACCTGTCTTTCCACCTTTCC<br/>         CGCTCCCCCGTCCATTACCACCTTTGTTAACTTTGG<br/>         GGGCACACTAGTAACCATTACATTAGGATTTA</p>                                                                                                                                                                                                                                                                                                                                    |
| <p style="writing-mode: vertical-rl; transform: rotate(180deg);">fos-1A (N-terminus)</p>  | <p>ccactctctatatagcaga</p>  | <p>CTTAGACATCCATCCAAATATTTAAATGTTGCTG<br/>         TTGCTTTTGGGTCAACAACGACACATACCTGTT<br/>         AGTGTCATCCTTCTGTTCCGCGTGCACGCATCGC<br/>         ACTGAATCATCGGTATTCATCACCTCTTCTCTGC<br/>         AATCAACGAGCCAAATGCCAATTGGGTTATTTGA<br/>         GTTAGAACTCGGGAAGCTTACAGAAAGAAATA<br/>         ATTAGCTGAATTGGCAAAGAGAGCACCTGCTCC<br/>         CCGGAATGTCATACTTTTGTAGAATAAAAGAAGG<br/>         GAAGACGACGACGTCTCCGGTTCTTCTATCCCA<br/>         AACAATACCATTTTTGTTTCCATCTCGTCTTCG<br/>         ATGTTGCTGACTCACCATCAATATCTAAACAGAA<br/>         AGCACCNAATGGTTCGCCTTTTTGTCTCCTTTC<br/>         TCGACAGTTTCTGTTTTTTTTGTATGTTACATAA<br/>         ATACCGTACACCCACCATCTAGTCAATTGTCACA<br/>         TATTGAAATCAAAAGTTATCAAAAATCTCGTG<br/>         CACTTTAATACACAGTTCCGTGGCCACCCCGT<br/>         CACCAGCCGGCTTTTCTTGGTGATATCAATTGG<br/>         CGGTGGCTCTTTGAAATTCAAATTTGGTGTGCT<br/>         CCTCCCGAAGGTGTGGGCGGAGCTTGGCACC<br/>         GTTCCGGTGGCCGTGCTCTCGACAGTTTTCT<br/>         CTTTCCCTCGCTCCTTTCTTCTCAACCAACA<br/>         CCTGCCACACACGCAACTTACTTTTGTATCGC<br/>         TGGTCCCTGTCCAAAGATACAATCAACCCGTG<br/>         TTGTGCTAATCATCACCTAGAAGAGTCACTTTCG<br/>         TGAATCAGAAATCCCTTTTCTTCCCTACTTTTTCT<br/>         CACTTCTATTCCCGGTTACTCACCTTCTGTGTT<br/>         GGCCCCGATCGTGTGTCAGCACGTCTGCTATAT<br/>         AAGAGAGTGCA</p>                                                                                                                                                                                                                                                                                                                                   | <p>ATGTTCGAACACCATCGTCGACGACTAACACCACC<br/>         ACGAGCTCTGTTCTGGCTCCGATTTCCAATCACTAC<br/>         TTCGAATTGGGTCCCAGGAACCCGATCAACCAAGC<br/>         GCACCCGACATCAGTCAATTGTTCCACCCGCAACA<br/>         TCACCATCAGATCCACCAACAACAACCCGACAACCTC<br/>         ACCTCTAACTCCGTGTACACCATATTATCCATCAAAT<br/>         GCATATGGACTCCCTTTATTCTTTGGAAGTGAATTC<br/>         TGCAGGTATGATACATCAACAATATCTTCTTAATTC<br/>         AGTGTACTTCAAAGTCCACTATTCCCTTGCTAATA<br/>         ATCAGGATTTTGTAGAGCTTTTAAATCATTACTTT<br/>         CACTCATTTTTCACTCAACCTCGAGCCTTACATTTGT<br/>         CAGTTGATCTCTTCTTCCATATAAAAATGAGATTA<br/>         TAGTAGCTTACTTTCATTTAGTTTAAATTAATTCTGA<br/>         AAGTATCAAACCAAAAAGTAAAGCGTTCACTAATTCT<br/>         TTTGTGCAAAAAGTCATGCAGAAAAAAGTTACCTAGC<br/>         TCTTGAATCTTTTCCCTCAAAAATGTTCTTACCAGCC<br/>         ATCTCCCCGGATTTTAGTTCGGAAAAAATAAAACT<br/>         ATTTGGTTATGGATTAATGTATATGGATAGGTGGT<br/>         GCACGAGGAATCTTAAAGAAGATGCCGACGTGTTT<br/>         ACACACTTCTACAGTAATCTATCTATCTTTACCTTT<br/>         CCCCCAATTGTTACTTTTGTGATCTTCTTACCTCTC<br/>         ATGCACTCGTAATCCGTTTTGGATTGTTTCTGTTT<br/>         GCACCTGTTGAAAAAGATAAGTAATACTTATATGTT<br/>         AACTTTTTTCCGTGCCAGTGAAAAATATTACAGGCAC<br/>         GCAAATTTTTTAAATTTCAAAAATATCTGTCACTTC<br/>         TGCTTTGAGCTTG</p> |

|                                  |                                   |                                                                                                                                                                                                                                                                                                                                                                                                                                                                                                                                                                                                                                                                                                                                                                                                                                                                                                                                                                                                                                                                                                                                                                                                                                                                                                                                                                                                                                                             |                                                                                                                                                                                                                                                                                                                                                                                                                                                                                                                                                                                                                                                                                                                                                                                                                                                                                                                                                                                                                                                                                                                                                                                                                                                                                                                                                                                                                                         |
|----------------------------------|-----------------------------------|-------------------------------------------------------------------------------------------------------------------------------------------------------------------------------------------------------------------------------------------------------------------------------------------------------------------------------------------------------------------------------------------------------------------------------------------------------------------------------------------------------------------------------------------------------------------------------------------------------------------------------------------------------------------------------------------------------------------------------------------------------------------------------------------------------------------------------------------------------------------------------------------------------------------------------------------------------------------------------------------------------------------------------------------------------------------------------------------------------------------------------------------------------------------------------------------------------------------------------------------------------------------------------------------------------------------------------------------------------------------------------------------------------------------------------------------------------------|-----------------------------------------------------------------------------------------------------------------------------------------------------------------------------------------------------------------------------------------------------------------------------------------------------------------------------------------------------------------------------------------------------------------------------------------------------------------------------------------------------------------------------------------------------------------------------------------------------------------------------------------------------------------------------------------------------------------------------------------------------------------------------------------------------------------------------------------------------------------------------------------------------------------------------------------------------------------------------------------------------------------------------------------------------------------------------------------------------------------------------------------------------------------------------------------------------------------------------------------------------------------------------------------------------------------------------------------------------------------------------------------------------------------------------------------|
| <p><i>h1h-2 (N-terminus)</i></p> | <p>agtttccagaacctcaatgg</p>       | <p>GACTGGTGAATGAATGGTGGGAGAAGAGATGGA<br/> GGACCCCGGGATAATAGAGGATTGTGTGCTGCA<br/> GGAGGTAGAGAGAGATGTTGTGGGCGTGACC<br/> TCTCCCGATCATCGTCTCTGCGTCTCTTGGATG<br/> AGACGGTCCCCGGGAGAAAGAATGTCTGCGTCT<br/> ATGTACACCAATATACTGTTTATGTCCCTTGAAT<br/> GGGCTTTTATACGCGTCCCTCCACTACCACCAC<br/> CCTCGAAGAACCATTCTAGCCACCCGCATAGC<br/> CGCTAAGAAGGGGGAGTGCACCTTTTTGCTCT<br/> TTTTTGTGTCTAAATCTGTTCCGTTTACTAGCTT<br/> TTCAAGTTCATGATCTTACTGTAATAAAACATAG<br/> CACATATTTTGAATGAAATACATAATGTATCCCAT<br/> CTTCTGATTTTGAATAAATTTCTCTCCTCCC<br/> AATTTTCAATTTTGGATCTTTTACCAAATAATTTT<br/> GATCTGCATTACTTTTTCTCACTCCTACAATGTTT<br/> ACGAATCCTTACCAATTTTGAATTTAAACAAGAA<br/> CGCAAATGTATTGTAGGGCAGTTTTTTTTTCAAT<br/> TATTGAGTTTATCAAAAAATGTATTTTGCATCCG<br/> AAATGTTACTAGCTCACGTTTAAAGCTTTTATATA<br/> TATCTTATCCTACGCTGAAATTTAAACTAATTTAT<br/> TAGATGGGCGCTGAAACCCCTTGTATCCATCACCC<br/> CTTTACTGTTATTTTATTGCTCTTTCGGGATGTCA<br/> TCCATCCGATAATCATCTACAATGACATCTACAT<br/> TTACAACATTTTCTTGATACCATCTCAACATCATT<br/> ACCTCCCTACAAAATTGTTCTCCTTCAAGTAACCT<br/> GCTCCTAATAATTTATACCGGAACCTTAGTAGATC<br/> TATTGTGACGTCACAATTATTATTCTTTATTGATC<br/> TACCTTGCCTCTTTTGTATCTCGTTTGCCTATTTAA<br/> CCAAACGAGGAGAATCGATTATTTTCTTCTTTTT<br/> CTTATTCTCAATATTTCTTCAATGGGTTGTCTT<br/> GACGAAAATCTAATCAGAATATATTTACTAACCT<br/> AATTTTTTACCTGCTGCTCCAGCCCAATTCCT<br/> ACTTATTCCTTTCTCTCCCGCTTCTCCGCTG<br/> ACTTTATTTCTTTGACATTACTATAATCGTCT<br/> TTCATATCATTTTCGAGAAATAAAGTTTTTCAGAA<br/> CCTCA</p> | <p>ATGGCGGATCCAATAGCCAACCTTACGTCAGCCACA<br/> ACTGTTGCAACTGCCGCCATTGCTCAACCACAGTT<br/> ATGCTTCCAAATGCATATGATTATCCTTATAATATTG<br/> ATCCGACAACGATTGATGCTGCTGATTATTGGAGTG<br/> GTTAGTCTTTTTTTCATTTGAAATCTATTATAATTTCA<br/> ATTATATCATTTGGTAAACCAACCAACATGTTTTTC<br/> GTGAATTTGTTAAAAGTCGCTTGTAAATCAGTTAGAAA<br/> TATTGGATAAATTGCAGAAAAAGGATATAAGTTTGGT<br/> ATTACTTATCTCGAATTGTTGAATTGTTGATTTTATAA<br/> GCTCGCAAATTTTTAAAATTTACTTTAAGTTGAAAACA<br/> AAATGTATAACTCTTTTAAATGTTCTAAAATTTGTAAA<br/> AATCTGGTTTGTCTAGTAAGTAGTTTATTAACCAAAA<br/> ATGTTTATATCTATTTCTCAAGTGAAGTCATCTAA<br/> ATAAACATTTTTCAGGATACCTCAACCCGATCCT<br/> CCGATGCAAAACAACGGATATTGATTATTCATCAGCC<br/> TTCTTCCAACACATCCACCAACTGAAACCCCTGCT<br/> TCCGTAGCTGCTCCAACCTTCTGCAACATCTGATATT<br/> AAGCCAATTCATGCAACATCATCCACTTCAACGACG<br/> GCTCCATCTACTGCTCCAGCTCCAACCTTCAACTACT<br/> GATGTGCTTGTAGTTAAAGCCAACAACAGCTCCAGCC<br/> ACGAATTCGAGAAACATCAGCGATTGTTGCTCCA<br/> CAGCCTCTTACTAATCTTACCGCACCAATTGACGCA<br/> ATGTCATCAATGTATACATGGCCACAAACATATCCA<br/> GGTTACCTTCCACCTTCCAGAGATAACAAAGCAAGT<br/> GAAGCTGTTAATCCATACATCTCAATCCCTCCAACAT<br/> ATACATTTGGTGTGATCCATCAGTTGCCGACTTCT<br/> CATCGTATCAGCAGCAACTTGTGACAGCCGGTA<br/> CGTTTCTATTCTTCTTGGTTTTATTGCTGTTTTACTGT<br/> TTTACCACAAGTTAATCTCGACGAATGATTGCTTGG<br/> CCCTCCTCAGCCGCAAGCATTACGATGCATAAT<br/> CCGCTTCTTTTTGATGTGAGCCGCCCTTCTGAAG<br/> ATTGAGATGCATGCAAAAGGCGGCATCTTCTTGAGA<br/> AGAACCCTGTGCGCACTAAACGACCTCC</p> |
|                                  | <p><i>nhr-67 (C-terminus)</i></p> | <p>ccacgtcattcgattgatcaat</p>                                                                                                                                                                                                                                                                                                                                                                                                                                                                                                                                                                                                                                                                                                                                                                                                                                                                                                                                                                                                                                                                                                                                                                                                                                                                                                                                                                                                                               | <p>N/A (made by SunyBiotech)</p>                                                                                                                                                                                                                                                                                                                                                                                                                                                                                                                                                                                                                                                                                                                                                                                                                                                                                                                                                                                                                                                                                                                                                                                                                                                                                                                                                                                                        |
| <p>agagagttaaatggaagagg</p>      |                                   | <p>N/A (made by SunyBiotech)</p>                                                                                                                                                                                                                                                                                                                                                                                                                                                                                                                                                                                                                                                                                                                                                                                                                                                                                                                                                                                                                                                                                                                                                                                                                                                                                                                                                                                                                            | <p>N/A (made by SunyBiotech)</p>                                                                                                                                                                                                                                                                                                                                                                                                                                                                                                                                                                                                                                                                                                                                                                                                                                                                                                                                                                                                                                                                                                                                                                                                                                                                                                                                                                                                        |

**Table S6: RNAi vectors**

| Gene Target          | Synthetic gene block                                                                                                                                                                                                                                                                                                                                                                                                                                                                                                                                                                                                                                                                                                                                                                                                                                                                                                                                                                                                                                                                                           |
|----------------------|----------------------------------------------------------------------------------------------------------------------------------------------------------------------------------------------------------------------------------------------------------------------------------------------------------------------------------------------------------------------------------------------------------------------------------------------------------------------------------------------------------------------------------------------------------------------------------------------------------------------------------------------------------------------------------------------------------------------------------------------------------------------------------------------------------------------------------------------------------------------------------------------------------------------------------------------------------------------------------------------------------------------------------------------------------------------------------------------------------------|
| <i>egl-43L(RNAi)</i> | TCACTATAGGGAGACCGGCAATGAGCATCGACACAGACTTCCTCACGAGTGTGGAGGTAAGGAGGATGAGCTACATGGA<br>AATGTGCTCATTGCAGTAACCTCAAATGCACTCGGAAGGACCATCGGTGTGATTGATAAGGCTACACCGAATGATTGCAAT<br>GCTCTTCTCATCTTGAACCTGATTAAGGAAGCTGATGACGGAGAAGATGCCAATATTTGTATGAGGCAGGAGGATAGAAA<br>ACTTTTCTACAAACCAGTAAGATTATCAATATTGGAGAGCGTCTTCTTCTACAAAGACTGTCCGAAGAGGAGTGTGATGAGG<br>AGGATCAGGATGATCTTGAGAATTTAATTTTGTAAAAGATGAAGATCGGCCGGACAGTACTCAAAGCTGCACAAAGAGCA<br>GCAGTGAAGACAGCAATCTAAACGGTTTCGAGGAGTATATTCGAGAACACGGCGAAGTGTACCTGGTCAAACGCTCCC<br>GACGGATCACACAAGTGTGGAGTTTGTCCAAAGAGTTTTTCAAGTGCAAGCGGTCTCAAACAACATCTCATATTCATTGCT<br>CCTTAAAGCCGTTTCGGTGTCAATTTGTGTCCAAAGTCTACACACAATTTCTCAAATCTGTGCAGGCACCGGAGAGTTCATT<br>AGACGGTTGGACGTGCCAACGTGTCAAAGTCAGGGGGGGGCCCGGTACCCAAT                                                                                                                                                                                                                                                                                                                                                       |
| <i>egl-43(RNAi)</i>  | TCACTATAGGGAGACCGGCAATGCCATCACAAAGCGGCAATACGAAGCATCGACCAGTTTGCAGATGACTGCACTCTAC<br>AAACCATTGATGGCGCAACTTCCGGATTGAGCGGAGCAGGTGGATTAGTTCCGTGCCATATTGGCCACATATACTTCAA<br>ATGGCAACAGCAGCACCACATTTCCCGCTTCTTTTCTTGGCCGCAATAGCAGAAAGCGTACAACACTGATGCAGCAGACGACG<br>TGTGCATCTCCAGATGCCGAGTGTCCAGTGGACATGCCAGTGAATCTTCACCAACTACAACCTGAACAGTGCACCTAACA<br>GCTACACCAAAACCTCCTTCCGACGTCTGAAATGGAACTACATCAAAGTCCGACGATGGAGAGGATCGTGACAGCATCGGA<br>GACTCTGGGAATGATGATGATGATGACTCAGAAGCTGGAGTTCTAGATGAGTCGTCCACAACAACGTCAACGAAAAAGCGT<br>CCGACATCTACACAATTTCCGACATACTCCACTCCACAACCTCGGTGCTCAGGCTTTGAATTCGACGTTCTTCCGATG<br>CTTCAGCGCTCGCTTAATTATAATCCAGCAGTTCATCGCCTCACTCATTTCTAAGAGCAATGAGCGGAGCAAAAAGCATCAT<br>CATCACCAGCTCGAGCAGTGGAAAGTGGAAAGGATAGGTACACGTGCAAGTTCTGTGCAGAAAGTGTCCCAAGATCAGCG<br>AATTTGACAAGACATTTAAGGACACATACAGGAGAGCAGCCTTATAAGTGTCAATATTGCGAGCGAAGCTTCTCAATCTCCT<br>CCTAATTTGCAACGCCACGTTAGAAACATTCATAATAAGCCGAACACCTCGCTGACACCCACAATCATCATCGTCAACGAA<br>GTCTGCACAATTAACCTCAACCTCCACTACTACTACTACCGTCCATCATCCTCTTCTTATCTTCCAGGAACGTCCGTTCC<br>GGTGCCAAAAGTTACCGGGCCCCCTCGAGG                           |
| <i>fos-1(RNAi)</i>   | CTCACTATAGGGAGACCGGCAAGATCTATGGTACAGTATAGCACGGTGAAGAAATCGTCGGCTGGGAGAAAACTAAAGAA<br>GAGGATAATATGGAGGATGACGATGATGATAAGAGGCTGAAACGTCGTCAAAGGAATAAAGAAGCTGCTGCAAGATGTCG<br>GCAAAGGAGAATTGATTTGATGAAGGAATTGCAAGATCAAGTAAATGACTTCAAATAAGCAACGACAAAAAATGGCGGAA<br>TGCAACAACATCCGAAATAAGCTCAACAGTCTCAAAAATCTTTGAAACGCATGATTGTAACCTGAGTCGCGAAGAACGAA<br>CACATGAGATAAATCGATTGATAATCCACCATCAACAGTTCACCATCACAACCATATCTTCAACATTCGTTGAGAGTTCAT<br>CCACCAGTGTGACTCTGTACCATATTCTATTTCGATCAGGACATTCATCTTTCATCGTGAACAACACTCACCAGTTGAGG<br>ACTATAAGCCTTCAATTGATCAATTACTTCTCCTCCAATCTCATGATTCAAATAATCAAAGATCGAAATCAATTCAATCTATGC<br>CACCACCAGCTTTACCGGCAAGCAGAGTGTGCTGGAATTCATGTTATCACTTCTATCCCGGTTTTCGCATGCCAATCATT<br>ACACGGTCTGTTCCGAAAACGTTTTCCGAGAACCGGAACGCAAAATCCAAAATCGAGTTGGACCAAACTGACATCATT<br>GACCATGCCAGACGACGTTGAACGTCGTCAGCTTTCGACGCTTTCAGAAATCGTTGAAAATCAGCCGATCACTACTCC<br>CAGCAGGCTTTCCGTCGCGGGGGGAATGATAAATCAAACACCGCAGAGTACAGGGAATGGACTATTCCGAGGCCAC<br>CAGGCCCATTCGACTTCTTCTCCTCAACACTGGTCTGACACCTTCTGGTCAGCCAACAATGAACCTCGTTTCAACTCCAAC<br>CCCGATTCAACCACATCCGGATGCTGATCTCCGACCCTCTAGGTGCACTCGAGGGGGGGCCCCG |
| <i>hlh-2(RNAi)</i>   | TCACTATAGGGAGACCGGCAATGGCGGATCCAAATAGCCAACCTACGTCAGCCACAACCTGTTGCAACTGCCGCCATTGCTC<br>AACCACAGGTTATGCTTCCAAATGCATATGATTATCCTTATAATATTGATCCGACAACGATTGATGCTGCTGATTATTGGAGT<br>GGATACCATCTCAACCGTATCTCCGATGCAAAACACGGATATTGATTATTCATCAGCCTTCTTCCAAACATCCACCAA<br>CTGAAACCCCTGCTCCGATGCTGCTCAACTTCTGCAACATCTGATATTAAGCCAATTCATGCAACATCATCCACTTCAAC<br>GACGGTCCATCTACTGCTCCAGCTCCAACCTCAACTACTGATGTGCTTGAAGTAAAGCCAACACAGCTCCAGCCACGAA<br>TTCTGCAGAAACATCAGCGATTGTTGCTCCACAGCCTTACTAATCTTACCGCACCAATTGACGCAATGTCATCAATGTAT<br>ACATGGCCACAACATATCCAGTTACCTTCCACCTTCCAGAAAGATAAACAAGCAAGTGAAGCTGTTAATCCATACATCTCAA<br>TCCCTCCAACATATACATTTGGTGTGATCCATCAGTTGCCGACTTCTCATCGTATCAGCAGCAACTTGTGGACAGCCGAA<br>TGGTCTTGGTGGAGATACCAACTTGGTTGACTACAATCATCAATCCCACAGCCGGTATGAGCCACACTTTGATCCAAAT<br>GGATATCCAGGAATGACCGGAATGCCACCAGGATCAAGTGCATCATCTGTTCCGAAATGATAAGTCTGCATCAAGAGCAACG<br>AGCCGTCGTCGGGTACAAGGCCCTCCATCTTCTGGAATCCAACCTCGCCATTATCGTCTTCAAGGCTTCTGATAATGAAT<br>CAATGAGTGTGACAAAGATACGGATAGGAGATCACAGAATAATGCTCGAGAAAGAGTACGAGTTCGTGACATCAGGGGG<br>GGCCCGGTACCCAAT                                            |
| <i>nhr-67(RNAi)</i>  | TCACTATAGGGAGACCGGCAATGATGACTGCGGTTTCCACAGATGTCGGTTCCAAGCAGTCAATTCTATTGGATGTTGATT<br>GTAGAGTCTGTGAAGATCATTGCTCGGGGAAGCATTACAGTATTTTTCTGCGACGGGTGTGCTGGATTCTTTAAACGTTT<br>AATCCGTCGTCATCGTCAATACGTTGCAAAAACAAGGCAAGTCCATCCGAAGGACAATGCAAAGTGGACAAAACACACCCG<br>CAACCAGTGCAGAGCTTGCCGACTAAGAAAGTGTCTGGAAATTTGGGATGAACAAAGATGCTGTCCAACATGAGAGAGGGC<br>CTCGTAACCTCAAGTTAAGACGACAACAGATGATGTTGATCATGGATCCTCTCCTAATTCGCCGGAAATGGGATCAGAAA<br>GTGATGCAATAATCTTCCGACATCATCAATGAATCGTGACACAGTGGCCGGTACTGCTGCTGCAATCTTTTTTGCATTGT<br>TGGATTTTGTGAGAATCCTTTGAATGGAGTACCTAAAGACGCAAAAGTGAACATGTTTCAACAACATTTGGCAGCACTTCT<br>GTTCTCCATGCAACTGAAACACGTGCCATAACTTCTAAGCAAATAAGGACTGAGACGATATCCGGTAGCTCAGAGCAAAGA<br>AATGCGGTTGCTAACGCTTTGAAATAATTGAACGTTTACAATTGGATAATAGAGAATACATGATGTTGAAACATTTCAAT<br>GTGGAGAGATACCCAAGTGAATTCAAATTTGCTTTTCAAGTTAGCATCTATTGCAATTTACACATAGAACCAGCCGACG<br>AGATATCAATGATAAATGCAATTTGCCGCTATTCCAACAACCTCAATAATTGATGTTCTATTCCGCCCTTCAATTTGGAT<br>AGCTTCAATGCCAAGACTTATCAAGACATGTTCAAGCCACCACAACAACCACTCCTACGTCATGTTTCAATGGGGGG<br>GGCCCGGTACCCAAT                                               |
